# Supplementary material
Source: MDPI journal article supplement (https://www.mdpi.com/2311-5637/5/4/84)
Supplement: s1 [file s1]

## **Xylose Enriched Ethanol Fermentation Stillage from Sweet Sorghum for Xylitol and Astaxanthin Production**

Ryan J. Stoklosa<sup>1\*</sup>, Nhuan P. Nghiem<sup>1</sup>, and Renee J. Latona<sup>1</sup>

<sup>1</sup>Sustainable Biofuels and Co-Products Research Unit, Eastern Regional Research Center, USDA, ARS, 600 East Mermaid Lane, Wyndmoor, PA, 19038, United States

†Mention of trade names or commercial products in this publication is solely for providing specific information and does not imply recommendation or endorsement by the U.S.

Department of Agriculture. ARS is an equal opportunity provider and employer.

\*Corresponding author: Ryan J. Stoklosa, ryan.stoklosa@usda.gov; Phone: +1-215-233-6634

### **Supplementary Information**

#### **ADDITIONAL ETHANOL PRODUCED IN SWEET SORGHUM JUICE (SSJ) COMBINED WITH LMAA-TREATED SWEET SORGHUM BAGASSE (SSB)**

Basis: 1 kg total mass at start of the experiment

$V_i$  = Initial liquid volume in L

Final Ethanol Concentration as Determined by HPLC = 69.6 g/L

Ethanol Density = 790 g/L

$V_f$  = Final Liquid Volume

$$69.6 \frac{g}{L} \times V_f = (V_f - 0.9) \times 790$$

Solving for  $V_f$  gives a final liquid volume of 0.99 L

Ethanol volume produced:

$$V_f - V_i = 0.99 L - 0.9 L = 0.09 L$$

Mass of ethanol produced:

$$0.9 L \times 790 \frac{g}{L} = 71.1 g \text{ ethanol}$$

Ethanol yield per liter of SSJ:

$$\frac{71.1 \text{ g} \times 1 \text{ L}}{0.9 \text{ L}} = 79.0 \text{ g ethanol}$$

Using the same calculation procedure, the control experiment where only SSJ was used for fermentation the ethanol yield per liter of juice was 66.0 grams.

Additional ethanol produced:

$$79.0 \text{ g ethanol} - 66.0 \text{ g ethanol} = 13.0 \text{ g ethanol per L of juice}$$

### **ETHANOL EFFICIENCY**

Glucan Mass Fraction in LMAA-treated SSB = 0.383 g glucan/g bagasse

Theoretical amount of glucose released assuming complete hydrolysis of LMAA-treated SSB (Basis 100 g):

$$0.383 \frac{\text{g glucan}}{\text{g SSB}} \times 100 \text{ g SSB} \times 1.11 \frac{\text{g glucose}}{\text{g glucan}} = 42.5 \text{ g glucose}$$

The value 1.11 g glucose/g glucan represents the anhydrous correction that converts mass of glucan to mass of glucose.

Theoretical amount of ethanol produced assuming complete hydrolysis of LMAA-treated SSB:

$$42.5 \text{ g glucose} \times 0.51 \frac{\text{g ethanol}}{\text{g glucose}} = 21.7 \text{ g ethanol}$$

The value 0.51 g ethanol/g glucose is the stoichiometric amount of ethanol that can be produced from glucose.

The efficiency of ethanol production is then calculated to be:

$$\left( \frac{13.0 \text{ g ethanol}}{21.7 \text{ g ethanol}} \right) \times 100\% = 60.0\%$$

## THEORETICAL XYLOSE YIELD AFTER HYDROLYSIS OF LMAA-TREATED SSB

Basis: 100 g of LMAA-treated SSB

Xylan Mass Fraction in LMAA-treated SSB = 0.224 g xylan/g SSB

Mass of xylose released assuming complete hydrolysis:

$$0.224 \frac{g \text{ xylan}}{g \text{ SSB}} \times 100 g \text{ SSB} \times 1.15 \frac{g \text{ xylose}}{g \text{ xylan}} = 33.6 g \text{ xylose}$$

The value 1.15 g xylose/g xylan represents the anhydrous correction that converts mass of xylan to mass of xylose.

Final Xylose Concentration as Determined by HPLC = 18.1 g/L

$$V_f = 0.99 L$$

Mass of xylose released:

$$18.1 \frac{g \text{ xylose}}{L} \times 0.99 L = 17.9 g \text{ xylose}$$

Calculation of xylose yield:

$$\left( \frac{17.9 g \text{ xylose}}{33.6 g \text{ xylose}} \right) \times 100\% = 53.3\%$$
